# Supplementary material
Source: Springer Nature journal article supplement (https://www.springermedizin.de/resource/supplementary/12876_2013_1088_MOESM3_ESM.pdf/9438462)

**A**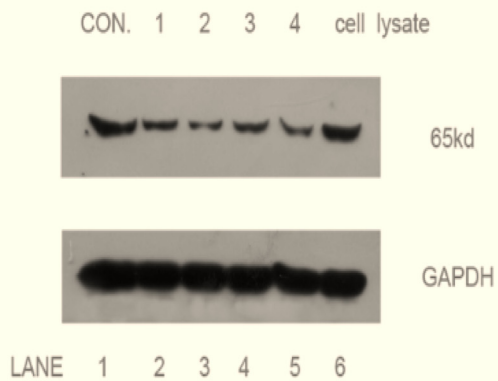**B**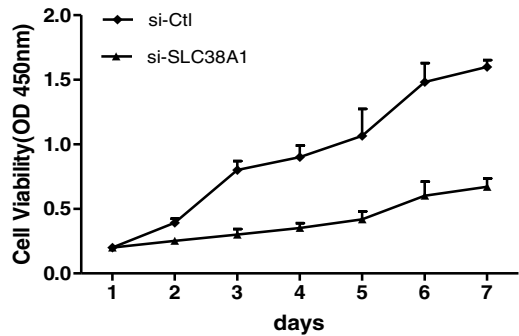**C**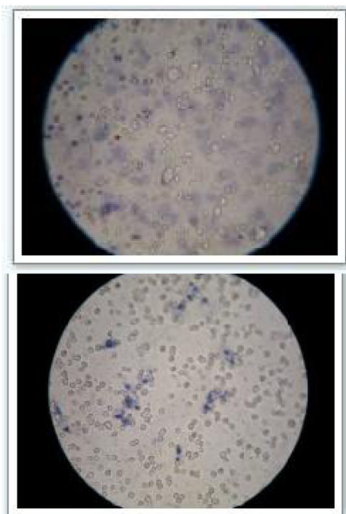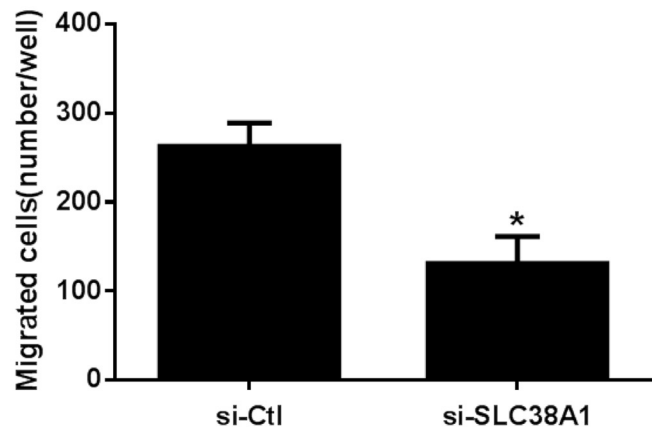

Supplement: MOESM3 [file 9438462]
